# Supplementary material for: Synthesis of rhombic hierarchical YF3 nanocrystals and their use as upconversion photocatalysts after TiO2 coating
Source: Royal Society of Chemistry journal article supplement (doi:10.1039/c3nr34018j), 2013-01-01
Supplement: c3nr34018j.pdf [file c3nr34018j.pdf]

## Supporting Information

### Synthesis of Rhombic Hierarchical YF<sub>3</sub> Nanocrystals and Their Use as Upconversion Photocatalysts after TiO<sub>2</sub> Coating

Zhengquan Li,\* Congling Li, Yuanyuan Mei, Limin Wang, Gaohui Du and Yujie Xiong\*

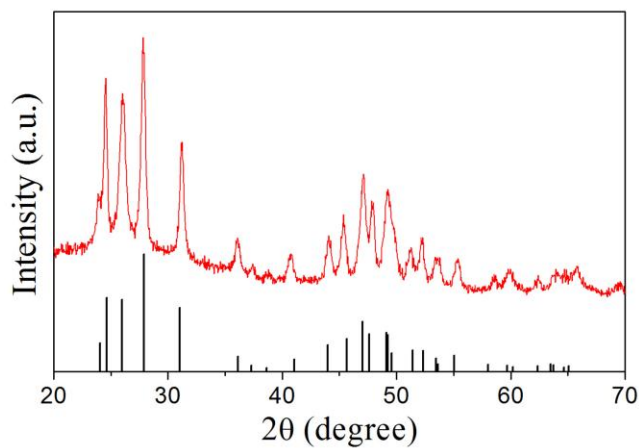

**Fig. S1** XRD pattern of the synthesized YF<sub>3</sub> nanocrystals. Standard XRD pattern of YF<sub>3</sub> crystals is given below as a reference to index the diffraction peaks.

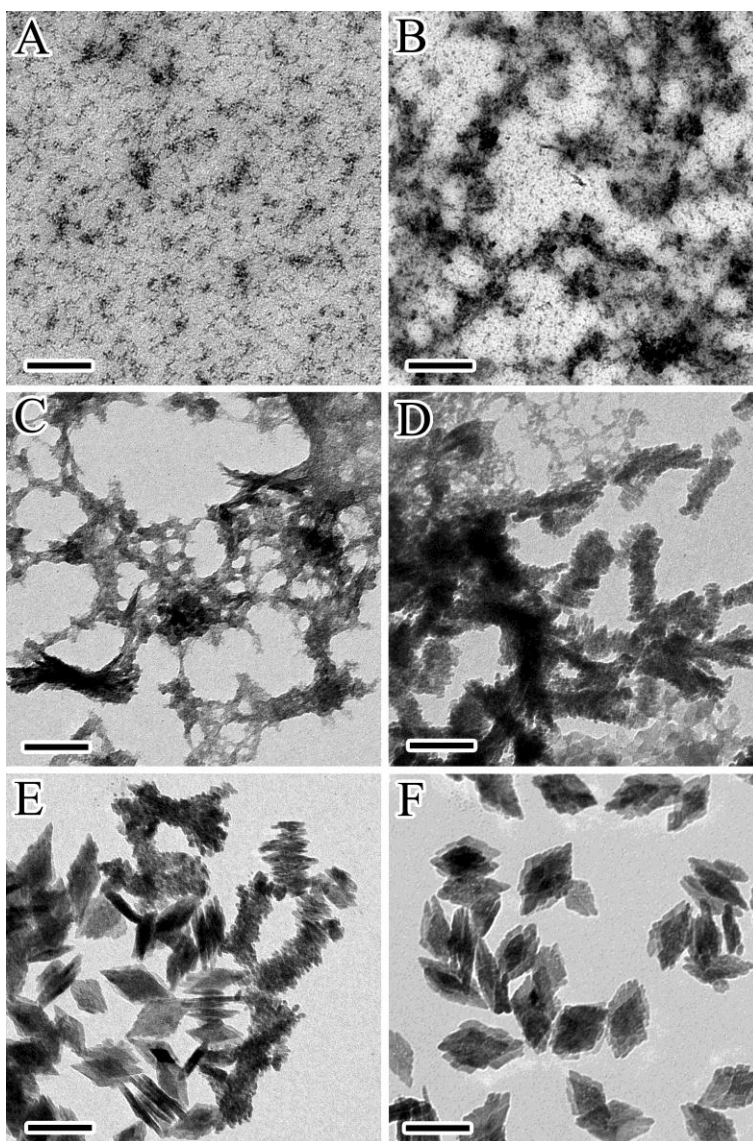

**Fig. S2** Typical TEM images of the intermediate samples collected during the synthesis of YF<sub>3</sub> rhombic particles in Fig. 1. The samples were collected at different time intervals: (A) right after NH<sub>4</sub>F was added at 80 °C; (B) after heated to 160 °C; (C) at 160 °C for 10 min; (D) at 160 °C for 30 min; (E) at 160 °C for 60 min; (F) at 160 °C for 90 min. Scale bar in all figures is 100 nm.

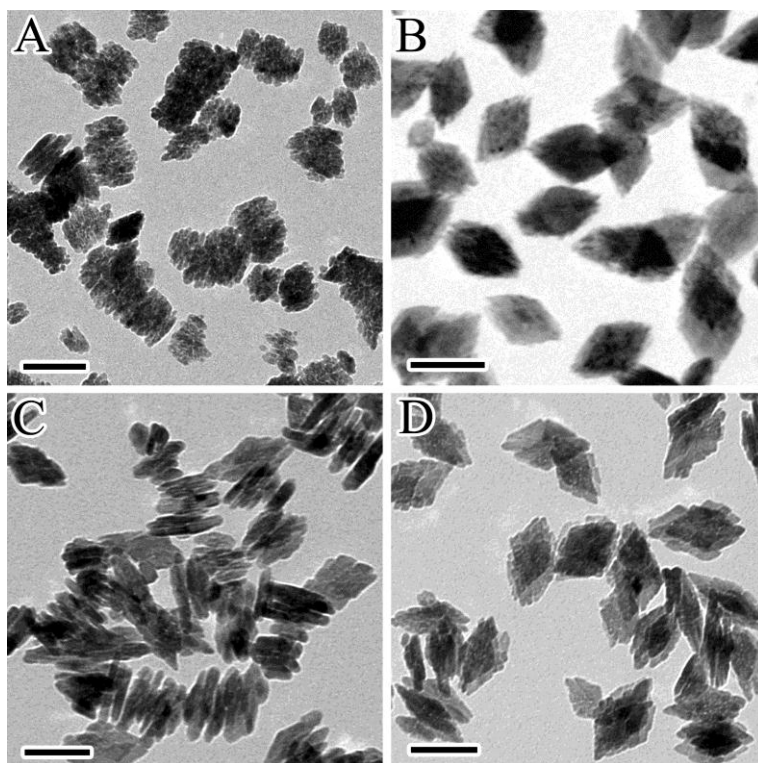

**Fig. S3** TEM images of the  $\text{YF}_3$  nanoparticles obtained under the same condition as that in Fig. 1, except the difference as follows: (A) free of water; (B) 0.2 mL water; (C) without PVP; (D) 0.224 g PVP. Scale bar in all figures is 100 nm. In the absence of a small amount of water (1 mL), a reaction process of 20 h is needed to formulate the similar hierarchical morphology. When too much water is added (more than 4 mL) in this system, the system temperature cannot reach 160 °C due to the low boiling point of water, and as a result, only irregular morphology can be obtained.

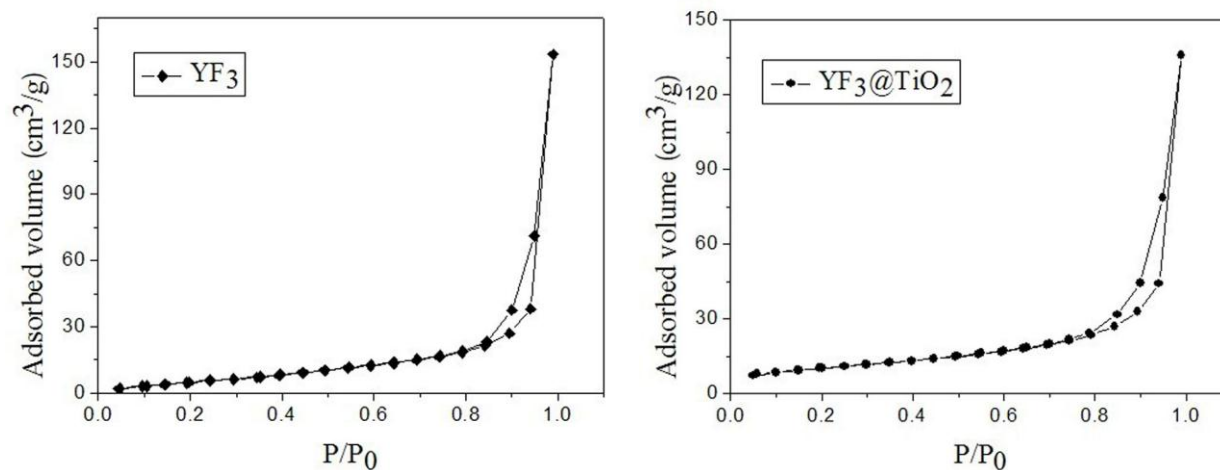

**Fig. S4** N<sub>2</sub> adsorption-desorption isotherm of (A) hierarchical YF<sub>3</sub>:Yb,Tm nanocrystals and (B) annealed YF<sub>3</sub>:Yb,Tm@TiO<sub>2</sub> particles. Effective surface area of the YF<sub>3</sub>:Yb,Tm nanocrystals are 25.86 m<sup>2</sup>/g, suggesting that such a hierarchical nanostructures possesses a relatively high surface area. After a TiO<sub>2</sub> layer was coated and annealed, surface area of the core-shell particles could reach 36.47 m<sup>2</sup>/g, indicating that these hierarchical cores could provide good templates to formulate TiO<sub>2</sub> shells with high surface area. When calculated based on the weight of TiO<sub>2</sub>, these TiO<sub>2</sub> shells have a surface area about 110.67 m<sup>2</sup>/g, which is higher than that from commercial P25 measured under the same condition (52.27 m<sup>2</sup>/g).

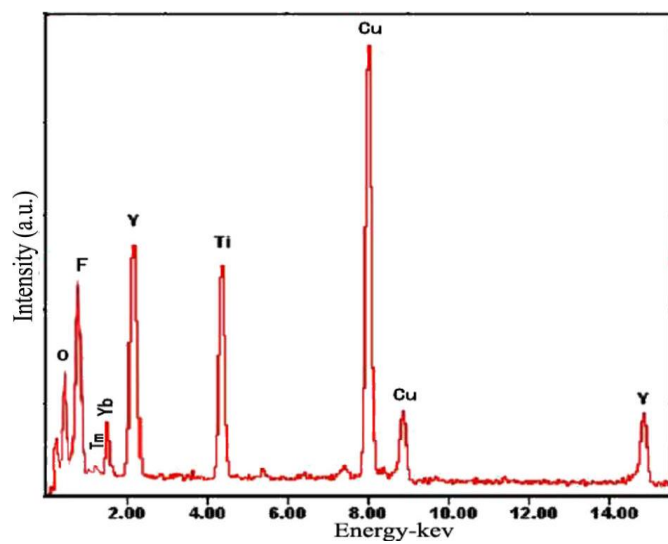

**Fig. S5** EDX spectrum of the annealed  $\text{YF}_3:\text{Yb,Tm}@TiO_2$  particles. The elements Y, F, Yb and Tm are from the core nanocrystals, while the elements Ti and O are from the shells. The element Cu is attributed to the copper grid used in the TEM and EDX characterizations.
